# Supplementary material for: Functionalized nanohybrids with rod shape for improved chemo-phototherapeutic effect against cancer by sequentially generating singlet oxygen and carbon dioxide bubbles
Source: Royal Society of Chemistry journal article supplement (doi:10.1039/d3bm00541k), 2023-01-01
Supplement: d3bm00541k1.pdf [file d3bm00541k1.pdf]

## Supporting Information

### Functionalized nanohybrids with rod shape for improved chemo-phototherapeutic effect against cancer by sequentially generating singlet oxygen and carbon dioxide bubbles

Wei Zhang,<sup>a,c</sup> Lu Chen,<sup>a</sup> Xianbin Zhang,<sup>c</sup> Peng Gong,<sup>c</sup> Xiyu Wang,<sup>b</sup> Zhiying Xu,<sup>a</sup>  
Ganyu Nie,<sup>a</sup> Lu Xu\*<sup>a</sup>

<sup>a</sup> School of Pharmacy, Shenyang Pharmaceutical University, Shenyang 110016, China

<sup>b</sup> School of Pharmaceutical Engineering, Shenyang Pharmaceutical University, Shenyang 110016, China.

<sup>c</sup> Department of General Surgery and Institute of Precision Diagnosis and Treatment of Digestive System Tumors, Carson International Cancer Center, Shenzhen University General Hospital, Shenzhen University, Shenzhen 518060, China

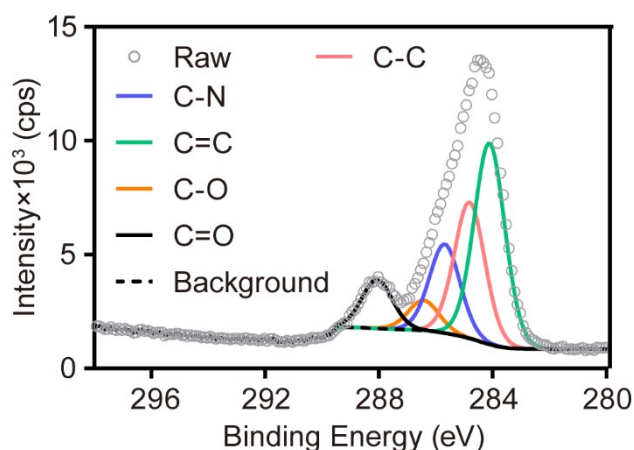

Fig. S1. High-resolution C 1s XPS spectra of PRMSs@ZF.

Table S1. DLC data of DOX or ICG-loaded samples.

| Drug-loaded samples | DLC ( $\mu\text{g}/\text{mg}$ ) |
|---------------------|---------------------------------|
| Da-RMSs             | 696.5                           |
| Da-PRMSs            | 981.4                           |
| IDa-PRMSs@ZF (DOX)  | 810.9                           |
| IDa-PRMSs@ZF (ICG)  | 489.9                           |
| I-PRMSs@ZF          | 540.6                           |

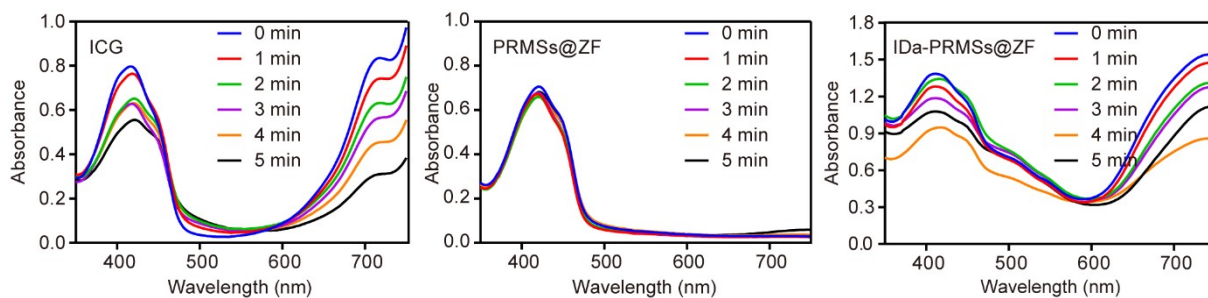

Fig. S2. UV-vis-NIR scanning spectra of ICG, PRMSs@ZF and I-PRMSs@ZF premixing with DPBF under irradiation.

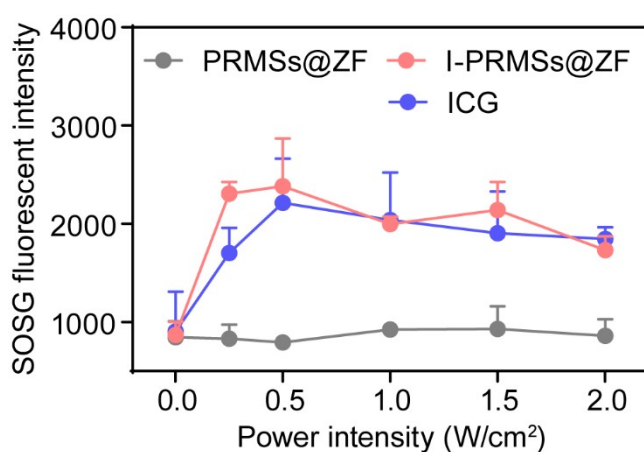

Fig. S3. Fluorescence intensity of SOSG as a function of laser irradiation time.

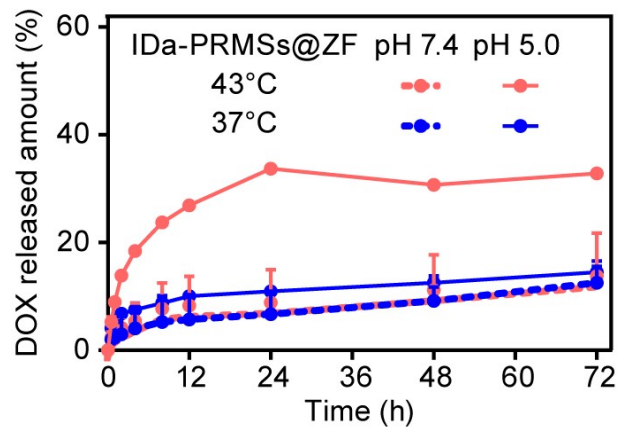

Fig. S4. Release curves for DOX in different release medium at 37 °C and 43 °C.

Table S2. Parameters describing release characteristics of DOX in different pH solutions at 43 °C.

| Kinetic model    | Parameter   | Formulation: IDa-PRMSs@ZF |                      |
|------------------|-------------|---------------------------|----------------------|
|                  |             | pH 7.4                    | pH 5.0               |
| Zero-order       | $R^2_{adj}$ | 0.1753±0.0148             | -0.3306±0.0951       |
|                  | $k_0$       | 0.2332±0.1397             | 0.6356±0.0098        |
| First-order      | $R^2_{adj}$ | 0.2215±0.0458             | -0.1216±0.0891       |
|                  | $k_1$       | 0.0026±0.0017             | 0.0089±0.0002        |
| Higuchi          | $R^2_{adj}$ | 0.8388±0.0166             | 0.6090±0.0388        |
|                  | $k_H$       | 1.8056±1.0903             | 5.1650±0.0578        |
| Korsmeyer-Peppas | $R^2_{adj}$ | 0.9729±0.0056             | 0.8993±0.0025        |
|                  | $k_{KP}$    | 3.5141±2.0405             | 12.3129±0.3015       |
|                  | $n$         | 0.3102±0.0085             | 0.2553±0.0104        |
| Peppas-Sahlin    | $R^2_{adj}$ | 0.9729±0.0085             | 0.9782±0.0032        |
|                  | $k_1$       | 3.3163±2.2641             | 10.6732±0.3867       |
|                  | $k_2$       | 0.0541±0.4805             | -0.8353±0.0752       |
|                  | $m$         | 0.3197±0.1183             | 0.4937±0.012         |
| Hixson-Crowell   | $R^2_{adj}$ | 0.2061±0.0355             | -0.1930±0.0913       |
|                  | $k_{HC}$    | 0.0008±0.0005             | 0.0026±0.0000        |
| Hopfenberg       | $R^2_{adj}$ | 0.1238±0.0515             | -0.2620±0.1003       |
|                  | $k_{HB}$    | 0.0000±0.0000             | 0.0000±0.0000        |
|                  | $n$         | 125.4184±68.3715          | 1125.6711±90.8598    |
| Baker-Lonsdale   | $R^2_{adj}$ | 0.8500±0.0240             | 0.6741±0.0347        |
|                  | $k_{BL}$    | 0.0001±0.0001             | 0.0006±0.0000        |
| Makoid-Banakar   | $R^2_{adj}$ | <b>0.9760±0.0010</b>      | <b>0.9799±0.0030</b> |
|                  | $k_{MB}$    | 3.4783±1.7365             | 9.7226±0.3613        |
|                  | $n$         | 0.2954±0.0907             | 0.4672±0.0180        |
|                  | $k$         | -0.0008±0.0043            | 0.0117±0.0003        |
| Quadratic        | $R^2_{adj}$ | 0.5195±0.0831             | 0.4679±0.0461        |
|                  | $k_1$       | -0.0001±0.0000            | -0.0002±0.0000       |
|                  | $k_2$       | 0.0055±0.0036             | 0.0194±0.0001        |

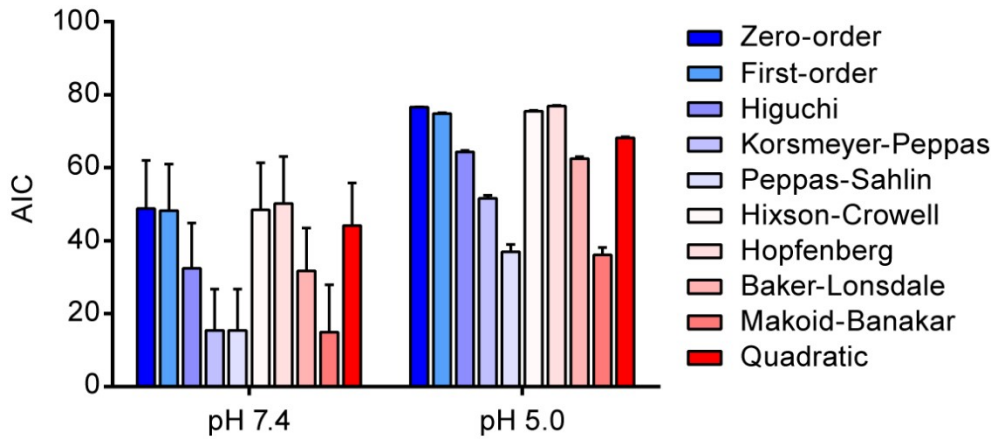

Fig. S5. The AIC value to evaluate goodness of fit after fitting the data in Fig. S1 at 43 °C.

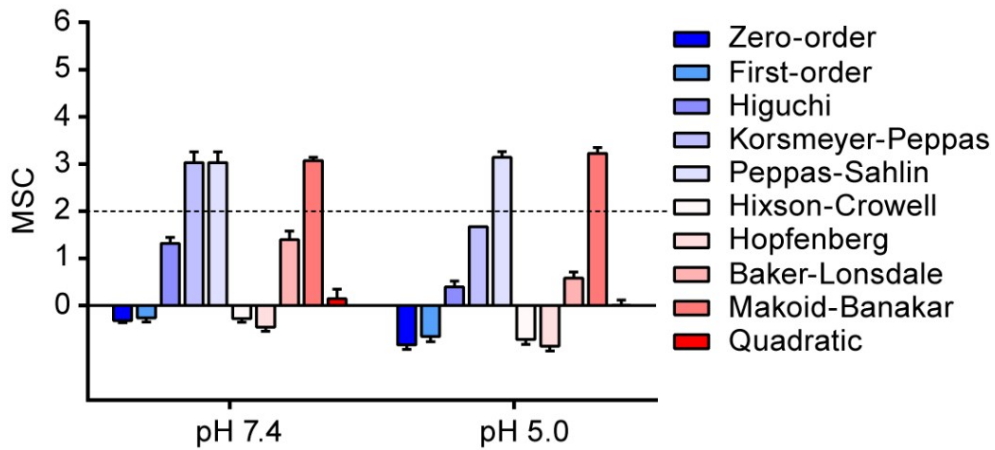

Fig. S6. The MSC value to evaluate goodness of fit after fitting the data in Fig. S1 at 43 °C.

Table S3. Parameters describing release characteristics of DOX from IDa-PRMSs@ZF at different pH values with/without NIR irradiation.

| Kinetic model    | Parameter   | Formulation: IDa-PRMSs@ZF |                      |                      |                      |
|------------------|-------------|---------------------------|----------------------|----------------------|----------------------|
|                  |             | pH 7.4                    | pH 5.0               | pH 7.4+N             | pH 5.0+N             |
| Zero-order       | $R^2_{adj}$ | -0.0532±1.4502            | -0.5893±0.0166       | -0.8815±0.6929       | -0.2447±0.3534       |
|                  | $k_0$       | 0.1980±0.0156             | 0.2590±0.0315        | 0.4383±0.0669        | 1.1194±0.0411        |
| First-order      | $R^2_{adj}$ | -0.0180±1.3937            | -0.5125±0.008        | -0.7219±0.6334       | 0.3014±0.2004        |
|                  | $k_1$       | 0.0021±0.0002             | 0.0029±0.0004        | 0.0054±0.0011        | 0.0295±0.0059        |
| Higuchi          | $R^2_{adj}$ | 0.5508±0.3740             | 0.5300±0.0097        | 0.4901±0.3131        | 0.7403±0.1148        |
|                  | $k_H$       | 1.4771±0.3508             | 2.0753±0.2466        | 3.5585±0.6583        | 8.8752±0.5035        |
| Korsmeyer-Peppas | $R^2_{adj}$ | 0.9646±0.0143             | <b>0.9882±0.0054</b> | 0.9432±0.0322        | 0.9348±0.0049        |
|                  | $k_{KP}$    | 2.5960±3.5406             | 5.5155±0.7078        | 8.1630±2.8014        | 16.6875±3.1605       |
|                  | $n$         | 0.6825±0.6947             | 0.2216±0.0031        | 0.2572±0.0512        | 0.3150±0.0410        |
| Peppas-Sahlin    | $R^2_{adj}$ | 0.9870±0.0088             | 0.4925±0.6965        | <b>0.9676±0.0180</b> | <b>0.9950±0.0012</b> |
|                  | $k_1$       | 2.6748±3.5377             | 5.0846±0.3472        | 8.1331±3.0199        | 13.9245±3.6773       |
|                  | $k_2$       | -0.3102±0.4457            | -0.4311±0.0480       | -0.7719±0.4724       | -0.8598±0.4295       |
|                  | $m$         | 0.6102±0.3465             | 0.3689±0.1147        | 0.4032±0.0332        | 0.5497±0.0658        |
| Hixson-Crowell   | $R^2_{adj}$ | -0.0298±1.4127            | -0.5382±0.0109       | -0.7767±0.6546       | 0.1138±0.2572        |
|                  | $k_{HC}$    | 0.0007±0.0001             | 0.0009±0.0001        | 0.0017±0.0003        | 0.0071±0.0011        |
| Hopfenberg       | $R^2_{adj}$ | -0.1340±1.5843            | -0.7019±0.0089       | -0.8656±0.6863       | 0.2430±0.2172        |
|                  | $k_{HB}$    | 0.0047±0.0066             | 0.0000±0.0000        | 0.0000±0.0000        | 0.0000±0.0000        |
| Baker-Lonsdale   | $n$         | 128.7732±181.9149         | 247.3225±106.6744    | 647.7313±164.0333    | 3894.3580±1421.2128  |
|                  | $R^2_{adj}$ | 0.5628±0.3490             | 0.5565±0.0064        | 0.5490±0.2794        | 0.8526±0.0669        |
|                  | $k_{BL}$    | 0.0000±0.0000             | 0.0001±0.0000        | 0.0002±0.0001        | 0.0020±0.0003        |
| Makoid-Banakar   | $R^2_{adj}$ | <b>0.9947±0.0028</b>      | 0.9878±0.0052        | 0.9630±0.02110       | 0.9948±0.0021        |
|                  | $k_{MB}$    | 2.5880±2.8600             | 5.4947±0.8393        | 7.4372±2.5604        | 13.1073±3.4290       |
|                  | $n$         | 0.3658±0.0948             | 0.2207±0.0286        | 0.3508±0.0407        | 0.5234±0.0866        |
|                  | $k$         | -0.0065±0.0183            | 0.0003±0.0015        | 0.0055±0.0010        | 0.0109±0.0018        |
| Quadratic        | $R^2_{adj}$ | 0.4829±0.7056             | 0.0608±0.0747        | 0.0135±0.4433        | 0.5896±0.1920        |
|                  | $k_1$       | 0.0000±0.0001             | -0.0001±0.0000       | -0.0001±0.0000       | -0.0004±0.0000       |
|                  | $k_2$       | 0.0039±0.0037             | 0.0069±0.0006        | 0.0129±0.0029        | 0.0336±0.0024        |

Table S4. Parameters describing release characteristics of DOX from ID-PRMSs@ZF at different pH values with/without NIR irradiation.

| Kinetic model    | Parameter   | Formulation: ID-PRMSs@ZF |                      |                      |                      |
|------------------|-------------|--------------------------|----------------------|----------------------|----------------------|
|                  |             | pH 7.4                   | pH 5.0               | pH 7.4+N             | pH 5.0+N             |
| Zero-order       | $R^2_{adj}$ | -1.3164±0.8169           | -0.5865±0.0897       | -0.9511±0.4974       | -0.3824±0.3566       |
|                  | $k_0$       | 0.3027±0.0473            | 0.6263±0.0754        | 0.4157±0.024         | 0.8850±0.0772        |
| First-order      | $R^2_{adj}$ | -1.2017±0.7709           | -0.3449±0.0380       | -0.7833±0.4598       | 0.0119±0.3497        |
|                  | $k_1$       | 0.0035±0.0006            | 0.0087±0.0016        | 0.0051±0.0004        | 0.0159±0.0025        |
| Higuchi          | $R^2_{adj}$ | 0.1557±0.3527            | 0.5934±0.0403        | 0.5232±0.2042        | 0.7521±0.1073        |
|                  | $k_H$       | 2.5042±0.4434            | 5.0357±0.6423        | 3.3535±0.2853        | 6.9060±0.4622        |
| Korsmeyer-Peppas | $R^2_{adj}$ | 0.8700±0.0799            | 0.9745±0.0092        | 0.9042±0.0288        | 0.9430±0.0013        |
|                  | $k_{KP}$    | 7.3204±2.3920            | 12.0848±1.8040       | 7.0469±1.3811        | 12.2725±0.6110       |
|                  | $n$         | 0.1930±0.0473            | 0.2474±0.0063        | 0.2730±0.0359        | 0.3237±0.0369        |
| Peppas-Sahlin    | $R^2_{adj}$ | -                        | <b>0.9954±0.0034</b> | <b>0.9591±0.0033</b> | 0.9938±0.0016        |
|                  | $k_1$       | -                        | 11.7642±1.3444       | 6.2681±1.1969        | 10.0981±1.2004       |
|                  | $k_2$       | -                        | -1.0579±0.1450       | -0.4853±0.1591       | -0.5858±0.2005       |
|                  | $m$         | -                        | 0.3945±0.0275        | 0.4801±0.0111        | 0.5508±0.0595        |
| Hixson-Crowell   | $R^2_{adj}$ | -1.2406±0.7867           | -0.4274±0.0562       | -0.8411±0.4734       | -0.1267±0.3547       |
|                  | $k_{HC}$    | 0.0011±0.0002            | 0.0026±0.0004        | 0.0016±0.0001        | 0.0043±0.0006        |
| Hopfenberg       | $R^2_{adj}$ | -1.4467±0.8568           | -0.4951±0.0422       | -0.9113±0.4923       | -0.0589±0.3748       |
|                  | $k_{HB}$    | 0.0000±0.0000            | 0.0000±0.0000        | 0.0000±0.0000        | 0.0000±0.0000        |
|                  | $n$         | 324.5137±12.2957         | 381.0174±77.8103     | 388.5797±303.3902    | 3226.1003±2246.1147  |
| Baker-Lonsdale   | $R^2_{adj}$ | 0.2037±0.3267            | 0.6674±0.0239        | 0.5779±0.1836        | 0.8339±0.0865        |
|                  | $k_{BL}$    | 0.0001±0.0000            | 0.0005±0.0002        | 0.0002±0.0000        | 0.0010±0.0002        |
|                  | $R^2_{adj}$ | <b>0.8776±0.0854</b>     | 0.9941±0.0041        | 0.9583±0.0019        | <b>0.9940±0.0023</b> |
| Makoid-Banakar   | $k_{MB}$    | 6.7615±2.4953            | 10.8508±1.2299       | 5.7837±1.0123        | 9.5127±1.0697        |
|                  | $n$         | 0.2789±0.0787            | 0.3402±0.0250        | 0.4441±0.0099        | 0.5260±0.0738        |
|                  | $k$         | 0.0050±0.0014            | 0.0051±0.0017        | 0.0095±0.0018        | 0.0103±0.0014        |
| Quadratic        | $R^2_{adj}$ | -0.3171±0.5629           | 0.2794±0.0138        | 0.2094±0.2158        | 0.5601±0.1926        |
|                  | $k_1$       | -0.0001±0.0000           | -0.0002±0.0000       | -0.0001±0.0000       | -0.0003±0.0000       |
|                  | $k_2$       | 0.0093±0.0017            | 0.0182±0.0029        | 0.0130±0.0017        | 0.0263±0.0015        |

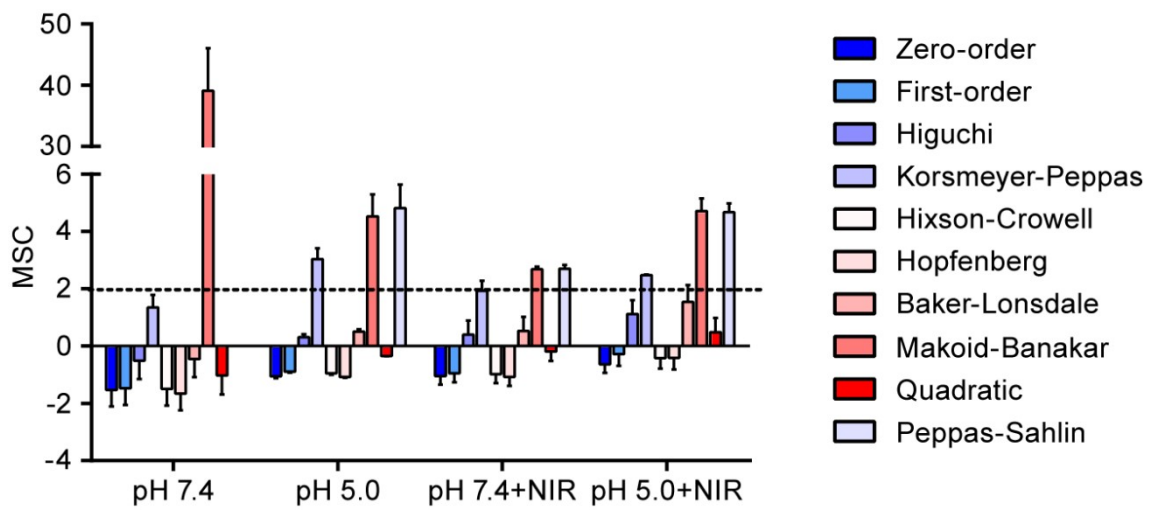

Fig. S7. The MSC value to evaluate goodness of fit after fitting the data in Fig. 4G.

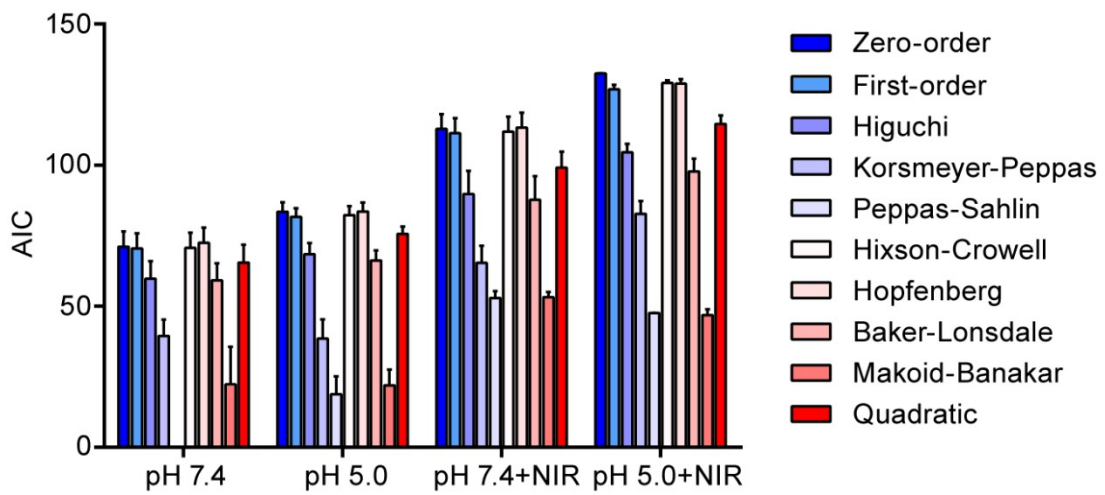

Fig. S8 The AIC value to evaluate goodness of fit after fitting the data in Fig. 4G.



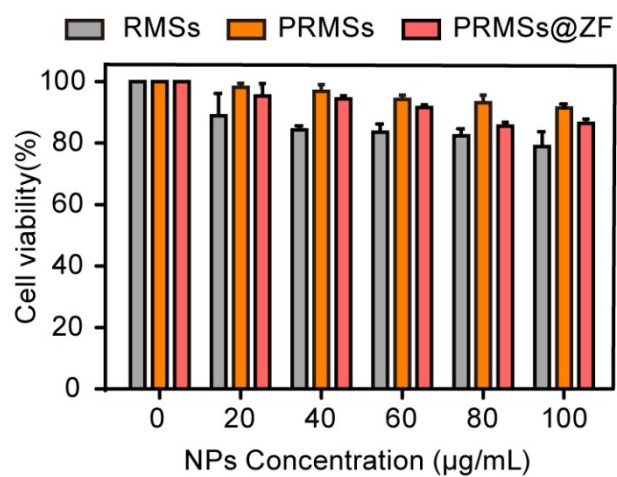

Fig. S9. Cell viability of 4T1 cells after incubation with blank NPs for 24 h.

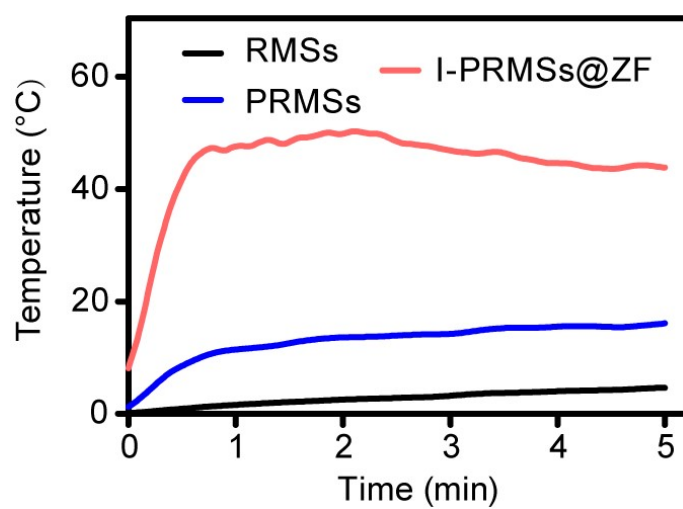

Fig. S10. Temperature variation of cell samples.

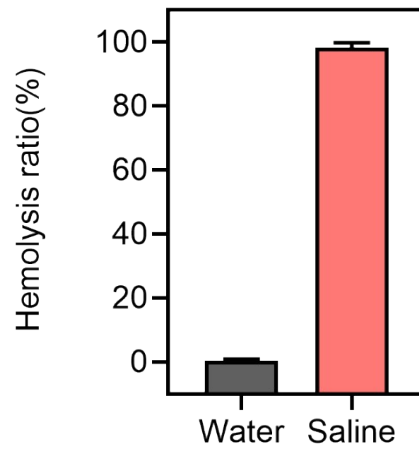

Fig. S11. Hemolytic ratio of water (positive control group) and normal physical saline (negative control group).

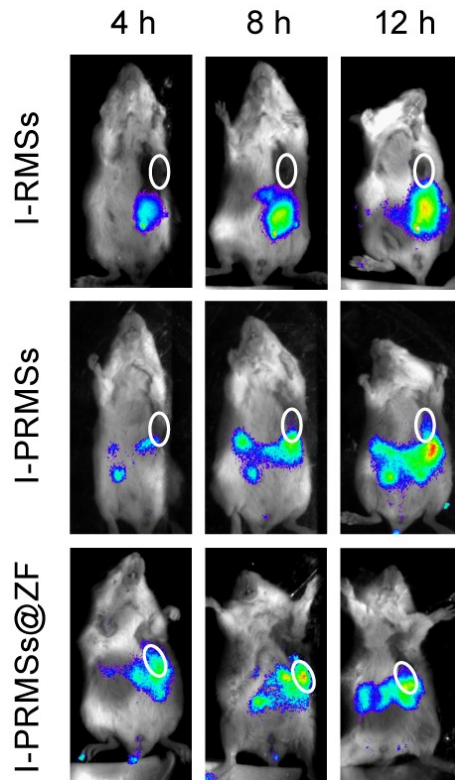

Fig. S12. Biodistribution of ICG-loaded NPs at 4 h, 8 h and 12 h post injection.

Table S5. Inhibition rates of DOX-loaded NPs.

|         | DOX  | Da-<br>RMSs | Da-<br>PRMSs | IDa-PRMSs@ZF | IDa-<br>PRMSs@ZF+NIR |
|---------|------|-------------|--------------|--------------|----------------------|
| TIR (%) | 61.6 | 58.3        | 41.3         | 71.1         | 83.8                 |
